# Supplementary material for: Global burden and trends of lung cancer incidence and mortality
Source: PubMed Central journal article supplement — Chin Med J (Engl). 2023 Mar 28;136(13):1583–90. doi: 10.1097/CM9.0000000000002529 (PMC10325747; doi:10.1097/cm9.0000000000002529), 2023-03-28
Supplement: cm9-136-1583-s001.pdf [file cm9-136-1583-s001.pdf]

**Supplementary Table 1: Male lung cancer incidence trends by countries and age, 2000–2012.**

| Countries | Age (years) | Trend 1   |                    | Trend 2   |                    | Trend 3 |     | AAPC 2000–2012     |
|-----------|-------------|-----------|--------------------|-----------|--------------------|---------|-----|--------------------|
|           |             | Period    | APC                | Period    | APC                | Period  | APC |                    |
| China     | ASIR        | 2000–2009 | -2.5* (-2.9, -2.2) | 2009–2012 | -0.3 (-2.2, 1.6)   |         |     | -2.0* (-2.4, -1.5) |
| China     | <40         | 2000–2012 | -3.2* (-5.5, -0.9) |           |                    |         |     | -3.2* (-5.5, -0.9) |
| China     | 40–49       | 2000–2007 | 0.6 (-1.3, 2.5)    | 2007–2012 | -4.7* (-7.7, -1.5) |         |     | -1.6* (-3.1, -0.2) |
| China     | 50–59       | 2000–2009 | -0.1 (-1.0, 0.9)   | 2009–2012 | 6.2* (0.7, 11.9)   |         |     | 1.5* (0.2, 2.8)    |
| China     | 60–69       | 2000–2009 | -3.9* (-4.5, -3.3) | 2009–2012 | 1.1 (-2.2, 4.6)    |         |     | -2.6* (-3.4, -1.9) |
| China     | 70–79       | 2000–2012 | -2.9* (-3.4, -2.3) |           |                    |         |     | -2.9* (-3.4, -2.3) |

|             |       |          |                  |          |              |          |              |                 |
|-------------|-------|----------|------------------|----------|--------------|----------|--------------|-----------------|
|             |       | 2000–201 | -2.6* (-3.3,     |          |              |          |              | -2.6* (-3.3,    |
| China       | >80   | 2        | -1.9)            |          |              |          |              | -1.9)           |
|             |       | 2000–201 | -1.2* (-1.6,     |          |              |          |              | -1.2* (-1.6,    |
| South Korea | ASIR  | 2        | -0.9)            |          |              |          |              | -0.9)           |
|             |       | 2000–201 | -3.4* (-5.6,     |          |              |          |              | -3.4* (-5.6,    |
| South Korea | <40   | 2        | -1.1)            |          |              |          |              | -1.1)           |
|             |       | 2000–201 | -1.6* (-2.7,     |          |              |          |              | -1.6* (-2.7,    |
| South Korea | 40–49 | 2        | -0.5)            |          |              |          |              | -0.5)           |
|             |       | 2000–201 | -1.8* (-2.3,     |          |              |          |              | -1.8* (-2.3,    |
| South Korea | 50–59 | 2        | -1.2)            |          |              |          |              | -1.2)           |
|             |       | 2000–201 | -1.1* (-1.7,     |          |              |          |              | -1.1* (-1.7,    |
| South Korea | 60–69 | 2        | -0.6)            |          |              |          |              | -0.6)           |
|             |       | 2000–201 | -1.6* (-2.2,     |          |              |          |              | -1.6* (-2.2,    |
| South Korea | 70–79 | 2        | -1.0)            |          |              |          |              | -1.0)           |
|             |       | 2000–201 | 0.6 (-0.3, 1.5)  |          |              |          |              | 0.6 (-0.3, 1.5) |
| South Korea | >80   | 2        |                  |          |              |          |              |                 |
| USA         | ASIR  | 2000–200 | -0.9* (-1.9, -0) | 2003–200 | -2.4* (-2.9, | 2008–201 | -3.8* (-4.3, | -2.5* (-2.8,    |

|         |       |          |                  |          |                  |          |              |                  |
|---------|-------|----------|------------------|----------|------------------|----------|--------------|------------------|
|         |       | 3        |                  | 8        | -1.8)            | 2        | -3.2)        | -2.2)            |
|         |       | 2000–201 | -3.9* (-4.9,     |          |                  |          |              | -3.9* (-4.9,     |
| USA     | <40   | 2        | -3.0)            |          |                  |          |              | -3.0)            |
|         |       | 2000–200 | -0.1 (-2.3, 2.2) | 2003–200 | -3.2* (-4.6,     | 2008–201 | -8.1* (-9.4, | -4.1* (-4.8,     |
| USA     | 40–49 | 3        |                  | 8        | -1.8)            | 2        | -6.8)        | -3.4)            |
|         |       | 2000–201 | -2.4* (-2.5,     |          |                  |          |              | -2.4* (-2.5,     |
| USA     | 50–59 | 2        | -2.2)            |          |                  |          |              | -2.2)            |
|         |       | 2000–200 | -1.9* (-2.4,     | 2005–201 | -4.1* (-4.5,     |          |              | -3.2* (-3.4,     |
| USA     | 60–69 | 5        | -1.3)            | 2        | -3.8)            |          |              | -2.9)            |
|         |       | 2000–200 | 0 (-0.7, 0.8)    | 2003–200 | -1.6* (-2.3,     | 2007–201 | -3.3* (-3.6, | -1.9* (-2.1,     |
| USA     | 70–79 | 3        |                  | 7        | -0.8)            | 2        | -2.9)        | -1.6)            |
|         |       | 2000–200 | 1.0* (0.4, 1.6)  | 2005–200 | -0.9 (-2.1, 0.4) | 2009–201 | -3.5* (-4.7, | -0.8* (-1.2,     |
| USA     | >80   | 5        |                  | 9        |                  | 2        | -2.3)        | -0.3)            |
| United  |       | 2000–200 | -3.6* (-5.2,     | 2003–201 | -0.8* (-1.1,     |          |              | -1.5* (-1.9,     |
| Kingdom | ASIR  | 3        | -1.8)            | 2        | -0.5)            |          |              | -1.1)            |
| United  |       | 2000–201 |                  |          |                  |          |              |                  |
| Kingdom | <40   | 2        | -0.2 (-2.0, 1.5) |          |                  |          |              | -0.2 (-2.0, 1.5) |

|                |                   |          |   |                    |          |   |                    |          |                    |                    |                    |
|----------------|-------------------|----------|---|--------------------|----------|---|--------------------|----------|--------------------|--------------------|--------------------|
| United Kingdom | 40–49             | 2000–200 | 3 | -7.1 (-13.9, 0.2)  | 2003–201 | 2 | -1.2 (-2.6, 0.2)   |          | -2.7* (-4.5, -0.9) |                    |                    |
| United Kingdom | 50–59             | 2000–201 | 2 | -1.8* (-2.1, -1.5) |          |   |                    |          | -1.8* (-2.1, -1.5) |                    |                    |
| United Kingdom | 60–69             | 2000–201 | 2 | -1.6* (-1.9, -1.2) |          |   |                    |          | -1.6* (-1.9, -1.2) |                    |                    |
| United Kingdom | 70–79             | 2000–200 | 2 | -5.1 (-10.3, 0.4)  | 2002–200 | 9 | -1.7* (-2.6, -0.7) | 2009–201 | 2                  | 1.2 (-1.6, 4.1)    | -1.5* (-2.5, -0.6) |
| United Kingdom | >80               | 2000–200 | 3 | -2.6 (-5.3, 0.3)   | 2003–200 | 7 | 2.2 (-0.7, 5.2)    | 2007–201 | 2                  | 1.0 (-2.3, 0.2)    | -0.4 (-1.4, 0.6)   |
| Australia      | ASIR <sup>#</sup> | 2000–201 | 2 | -1.3* (-1.7, -0.9) |          |   |                    |          |                    | -1.3* (-1.7, -0.9) |                    |
| Australia      | <40               | 2000–201 | 2 | -0.3 (-2.3, 1.8)   |          |   |                    |          |                    | -0.3 (-2.3, 1.8)   |                    |
| Australia      | 40–49             | 2000–201 | 2 | -0.3 (-2.1, 1.6)   |          |   |                    |          |                    | -0.3 (-2.1, 1.6)   |                    |
| Australia      | 50–59             | 2000–201 | 2 | -1.7* (-2.2, -1.2) |          |   |                    |          |                    | -1.7* (-2.2, -1.2) |                    |



**Supplementary Table 2: Female lung cancer incidence trends by countries and age, 2000–2012.**

| Countries | Age (years) | Trend 1   |                     | Trend 2   |                   | Trend 3 |     | AAPC 2000–2012     |
|-----------|-------------|-----------|---------------------|-----------|-------------------|---------|-----|--------------------|
|           |             | Period    | APC                 | Period    | APC               | Period  | APC |                    |
| China     | ASIR        | 2000–2008 | -1.4* (-2.6, -0.3)  | 2008–2011 | 2.7 (-0.8, 6.2)   |         |     | -0.1 (-1.3, 1.1)   |
| China     | <40         | 2000–2002 | -22.8 (-50.4, 20.3) | 2002–2011 | 2.9 (-0.6, 6.5)   |         |     | -1.9 (-8.3, 4.9)   |
| China     | 40–49       | 2000–2011 | 1.8* (0.9, 2.8)     |           |                   |         |     | 1.8* (0.9, 2.8)    |
| China     | 50–59       | 2000–2009 | 0 (-1.4, 1.5)       | 2009–2011 | 10.7* (2.2, 19.8) |         |     | 2.6* (0.6, 4.6)    |
| China     | 60–69       | 2000–2009 | -2.4* (-4.0, -0.8)  | 2009–2011 | 6.6 (-2.5, 16.6)  |         |     | -0.2 (-2.4, 2.0)   |
| China     | 70–79       | 2000–2011 | -1.2* (-2.0, -0.5)  |           |                   |         |     | -1.2* (-2.0, -0.5) |
| China     | >80         | 2000–2011 | -1.9* (-2.4, -1.4)  |           |                   |         |     | -1.9* (-2.4, -1.4) |

|             |       |          |                  |          |                 |  |  |  |                  |
|-------------|-------|----------|------------------|----------|-----------------|--|--|--|------------------|
|             |       | 2        | -1.3)            |          |                 |  |  |  | -1.3)            |
|             |       | 2000–200 |                  | 2003–201 |                 |  |  |  |                  |
| South Korea | ASIR  | 3        | -2.3 (-4.8, 0.3) | 2        | 2.3* (1.8, 2.8) |  |  |  | 1.1* (0.5, 1.8)  |
|             |       | 2000–201 |                  |          |                 |  |  |  |                  |
| South Korea | <40   | 2        | 2.0 (-0.4, 4.6)  |          |                 |  |  |  | 2.0 (-0.4, 4.6)  |
|             |       | 2000–201 |                  |          |                 |  |  |  |                  |
| South Korea | 40–49 | 2        | 3.2* (1.8, 4.7)  |          |                 |  |  |  | 3.2* (1.8, 4.7)  |
|             |       | 2000–201 |                  |          |                 |  |  |  |                  |
| South Korea | 50–59 | 2        | 2.8* (1.7, 4.1)  |          |                 |  |  |  | 2.8* (1.7, 4.1)  |
|             |       | 2000–200 | -4.0* (-7.4,     | 2004–201 |                 |  |  |  |                  |
| South Korea | 60–69 | 4        | -0.5)            | 2        | 4.1* (2.8, 5.4) |  |  |  | 1.3* (0.1, 2.6)  |
|             |       | 2000–201 |                  |          |                 |  |  |  |                  |
| South Korea | 70–79 | 2        | -0.3 (-1.0, 0.3) |          |                 |  |  |  | -0.3 (-1.0, 0.3) |
|             |       | 2000–201 |                  |          |                 |  |  |  |                  |
| South Korea | >80   | 2        | 1.2* (0.2, 2.2)  |          |                 |  |  |  | 1.2* (0.2, 2.2)  |
|             |       | 2000–200 |                  | 2006–201 | -2.2* (-2.6,    |  |  |  | -0.9* (-1.2,     |
| USA         | ASIR  | 6        | 0.4 (-0.1, 0.8)  | 2        | -1.7)           |  |  |  | -0.7)            |

|         |       |          |                  |          |                  |          |              |                 |
|---------|-------|----------|------------------|----------|------------------|----------|--------------|-----------------|
|         |       | 2000–201 | –3.6* (–4.4,     |          |                  |          |              | –3.6* (–4.4,    |
| USA     | <40   | 2        | –2.8)            |          |                  |          |              | –2.8)           |
|         |       | 2000–200 |                  | 2005–200 |                  | 2009–201 | –7.0* (–9.8, | –1.4* (–2.5,    |
| USA     | 40–49 | 5        | 2.9* (1.5, 4.3)  | 9        | –2.4 (–5.4, 0.7) | 2        | –4.0)        | –0.3)           |
|         |       | 2000–200 | –1.7* (–2.2,     | 2007–201 |                  |          |              | –1.0* (–1.4,    |
| USA     | 50–59 | 7        | –1.2)            | 2        | –0.1 (–0.9, 0.8) |          |              | –0.6)           |
|         |       | 2000–200 |                  | 2006–201 | –3.4* (–4.0,     |          |              | –1.9* (–2.2,    |
| USA     | 60–69 | 6        | –0.3 (–0.9, 0.2) | 2        | –2.9)            |          |              | –1.6)           |
|         |       | 2000–200 |                  | 2005–200 |                  | 2008–201 | –1.9* (–2.9, |                 |
| USA     | 70–79 | 5        | 2.0* (1.3, 2.7)  | 8        | –0.3 (–3.3, 2.8) | 2        | –1.0)        | 0.1 (–0.6, 0.8) |
|         |       | 2000–200 |                  | 2003–200 |                  | 2009–201 | –3.0* (–4.5, |                 |
| USA     | >80   | 3        | 4.3* (2.8, 5.9)  | 9        | 1.8* (1.1, 2.5)  | 2        | –1.5)        | 1.2* (0.7, 1.7) |
| United  |       | 2000–200 |                  | 2002–201 |                  |          |              |                 |
| Kingdom | ASIR  | 2        | –1.6 (–4.3, 1.1) | 2        | 2.0* (1.8, 2.2)  |          |              | 1.4* (1.0, 1.8) |
| United  |       | 2000–201 |                  |          |                  |          |              |                 |
| Kingdom | <40   | 2        | 0.9 (–2.1, 4.0)  |          |                  |          |              | 0.9 (–2.1, 4.0) |
| United  | 40–49 | 2000–201 | –1.1* (–2.1,     |          |                  |          |              | –1.1* (–2.1,    |

|           |       |          |                  |          |                 |          |                 |                  |
|-----------|-------|----------|------------------|----------|-----------------|----------|-----------------|------------------|
| Kingdom   |       | 2        | -0.1)            |          |                 |          |                 | -0.1)            |
| United    |       | 2000–200 |                  | 2006–201 |                 |          |                 |                  |
| Kingdom   | 50–59 | 6        | 1.8* (0.5, 3.1)  | 2        | 0.1 (-1.2, 1.4) |          |                 | 1.0* (0.2, 1.7)  |
| United    |       | 2000–200 |                  | 2002–200 |                 | 2005–201 |                 |                  |
| Kingdom   | 60–69 | 2        | -3.4 (-8.0, 1.4) | 5        | 4.0 (-1.0, 9.2) | 2        | 2.3* (1.6, 2.9) | 1.7* (0.6, 2.9)  |
| United    |       | 2000–201 |                  |          |                 |          |                 |                  |
| Kingdom   | 70–79 | 2        | 0.9* (0.5, 1.3)  |          |                 |          |                 | 0.9* (0.5, 1.3)  |
| United    |       | 2000–201 |                  |          |                 |          |                 |                  |
| Kingdom   | >80   | 2        | 4.1* (3.5, 4.7)  |          |                 |          |                 | 4.1* (3.5, 4.7)  |
|           |       | 2000–201 |                  |          |                 |          |                 |                  |
| Australia | ASIR  | 2        | 1.6* (1.1, 2.1)  |          |                 |          |                 | 1.6* (1.1, 2.1)  |
|           |       | 2000–201 |                  |          |                 |          |                 |                  |
| Australia | <40   | 2        | 1.7 (-1.1, 4.6)  |          |                 |          |                 | 1.7 (-1.1, 4.6)  |
|           |       | 2000–201 |                  |          |                 |          |                 |                  |
| Australia | 40–49 | 2        | -0.4 (-1.8, 1.0) |          |                 |          |                 | -0.4 (-1.8, 1.0) |
|           |       | 2000–201 |                  |          |                 |          |                 |                  |
| Australia | 50–59 | 2        | 1.0 (-0.1, 2.1)  |          |                 |          |                 | 1.0 (-0.1, 2.1)  |

|           |       |          |                 |                 |
|-----------|-------|----------|-----------------|-----------------|
|           |       | 2000–201 |                 |                 |
| Australia | 60–69 | 2        | 1.7* (1.0, 2.4) | 1.7* (1.0, 2.4) |
|           |       | 2000–201 |                 |                 |
| Australia | 70–79 | 2        | 1.7* (1.3, 2.1) | 1.7* (1.3, 2.1) |
|           |       | 2000–201 |                 |                 |
| Australia | >80   | 2        | 3.2* (2.2, 4.1) | 3.2* (2.2, 4.1) |

---

AAPC: Average annual percent change; APC: Annual percent change; ASIR: Age-standardized incidence rate; USA: The United States of America. \*The APC or AAPC is significantly different from zero ( $P < 0.05$ ). ASIR was calculated by using world Segi's standard population.
